# Supplementary material
Source: PubMed Central journal article supplement (PMC7154046)
Supplement: 13205_2020_2190_MOESM1_ESM.pdf [file 13205_2020_2190_MOESM1_ESM.pdf]

**Supplement Table 1.** The primers used in this study

| Name                    | Sequence                                               |
|-------------------------|--------------------------------------------------------|
| LOC102546895-siRNA-789  | 5'-CCUGUGCCUUUGACCCUAUTT<br>AUAGGGUCAAAAGGCACAGGTT -3' |
| LOC102546895-siRNA-1256 | 5'-CCCAAGAGCUUUGAGAGAUTT<br>AUCUCUCAAAAGCUCUUGGGTT-3'  |
| LOC102546895-siRNA-1850 | 5'-GCCAUGGAAUCUUUCUCAUTT<br>AUGAGAAAGAUUCCAUGGCTT-3'   |
| siRNA-NC                | 5'-UUCUCCGAACGUGUCACGUTT<br>ACGUGACAC GUUCGGAGAATT-3'  |
| GAPDH-F                 | 5'-TGGAGAAACCTGCCAAGTATGAT-3'                          |
| GAPDH-R                 | 5'-TCAAAGGTGGAAGAATGGGAGT-3'                           |
| LOC102546895-F          | 5'- GCTGCTGAGGTGTCTGTAGGCT-3'                          |
| LOC102546895-R          | 5'-TGGGACGGCAACCAATCA-3'                               |
| LOC103692676-F          | 5'-ATGGACAAGAGAGCAGAAATCACT-3'                         |
| LOC103692676-R          | 5'-GCAGTTAGGGATACCAGCCAAT-3'                           |
| LOC100911992-F          | 5'-CAGCAAGCAGAAGTGGACGG-3'                             |
| LOC100911992-R          | 5'-GGGAAATGGATGGTCAGGCT-3'                             |
| Ncl-ps1-F               | 5'-AAAACCTTGAAGAAAAGCAGGG-3'                           |
| Ncl-ps1-R               | 5'-GTTGCTTTCTCGAATACTTCCTGA-3'                         |
| LOC103692397-F          | 5'-CAATGCTTCTTCATCAGCCACTT-3'                          |
| LOC103692397-R          | 5'-CATCAGCACTGGTGGATTAGCA-3'                           |
| Tnf-F                   | 5'-GCCACCACGCTCTTCTGTCTA-3'                            |
| Tnf-R                   | 5'-GGGCTACGGGCTTGTCACT-3'                              |
| Il1b-F                  | 5'-ACAGACCCCAAAGATTAAGGATT-3'                          |

II1b-R

5'-CCACGGGCAAGACATAGGTAG-3'

---
