# Supplementary material
Source: PubMed Central journal article supplement (PMC7154046)
Supplement: 13205_2020_2190_MOESM2_ESM.pdf [file 13205_2020_2190_MOESM2_ESM.pdf]

**Supplement Table 2.** Raw data quality control and statistics

|       | Clead<br>Reads | Filter (%) | GC (%) | Mapped     | MappedRate (%) |
|-------|----------------|------------|--------|------------|----------------|
| Dex1  | 91,981,830     | 0.9648     | 44.5   | 86,935,362 | 94.5           |
| Dex2  | 81,534,914     | 0.9650     | 44.5   | 76,635,957 | 94             |
| Dex3  | 94,301,368     | 0.9698     | 44     | 87,393,215 | 92.7           |
| POCD1 | 86,052,988     | 0.9647     | 44.5   | 80,721,450 | 93.8           |
| POCD2 | 86,734,256     | 0.9638     | 43     | 81,201,616 | 93.6           |
| POCD3 | 84,936,714     | 0.9606     | 44.5   | 79,483,082 | 93.6           |
