# Supplementary material
Source: PubMed Central journal article supplement (PMC7154046)
Supplement: 13205_2020_2190_MOESM3_ESM.pdf [file 13205_2020_2190_MOESM3_ESM.pdf]

**Supplement Table 3.** Number of mRNAs and lncRNAs

|        | Total | DEG | Up | Down |
|--------|-------|-----|----|------|
| mRNA   | 23422 | 397 | 99 | 298  |
| LncRNA | 5897  | 60  | 16 | 44   |
